# Supplementary material for: Pd2Se3monolayer: a novel two-dimensional material with excellent electronic, transport, and optical properties
Source: Royal Society of Chemistry journal article supplement (doi:10.1039/c8tc00810h), 2018-01-01
Supplement: c8tc00810h1.pdf [file c8tc00810h1.pdf]

Electronic Supplementary Information

**Pd<sub>2</sub>Se<sub>3</sub> Monolayer: A Novel Two-Dimensional Material with  
Excellent Electronic, Transport, and Optical Properties**

Xiaorong Zhu, Feng Li, Yu Wang, Man Qiao, Yafei Li\*

†Jiangsu Key Laboratory of New Power Batteries, Jiangsu Collaborative Innovation  
Centre of Biomedical Functional Materials, School of Chemistry and Materials  
Science, Nanjing Normal University, Nanjing 210023, China,

\*To whom correspondence should be addressed. Email: [liyafei.abc@gmail.com](mailto:liyafei.abc@gmail.com) (Y.L.)

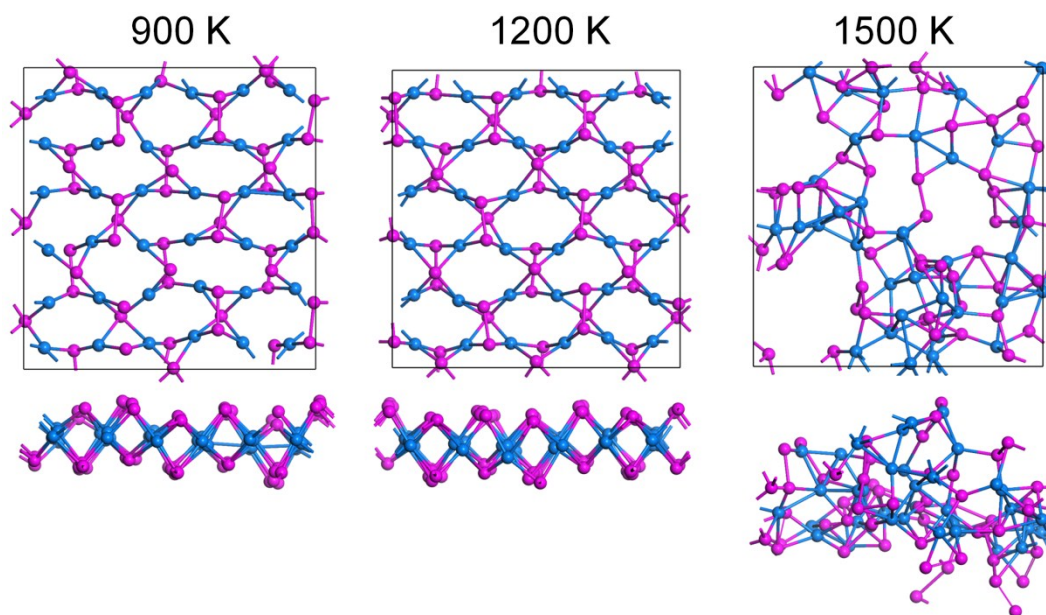

**Fig. S1** Top and side views of snapshots of Pd<sub>2</sub>Se<sub>3</sub> monolayer equilibrium structures at 900 K (left), (b) 1200 K (middle), and (c) 1500 K (right) at the end of 10 ps first-principles molecular dynamics simulations.

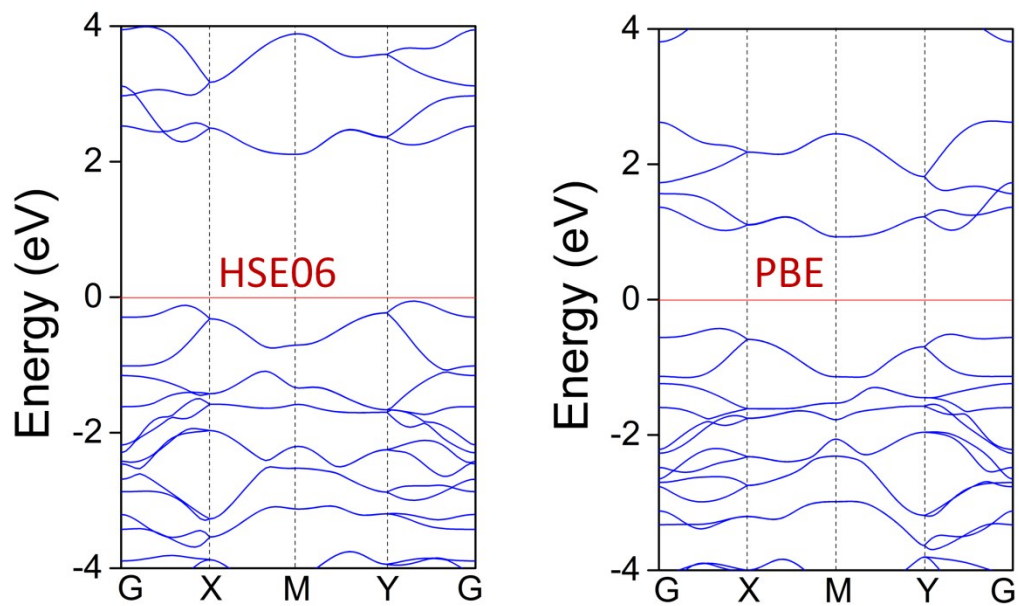

**Fig. S2** Band structure of PdSe<sub>2</sub> monolayer computed using (a) HSE06 and (b) PBE functional.

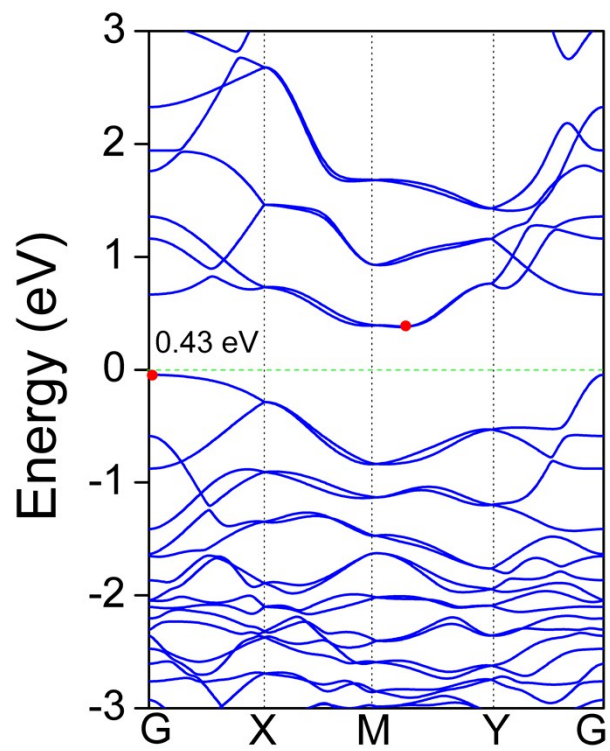

**Fig. S3** Band structure of Pd<sub>2</sub>Se<sub>3</sub> monolayer computed using PBE functional including spin-orbital coupling (SOC).
